# Supplementary material for: Immunity to vector saliva is compromised by short sand fly seasons in endemic regions with temperate climates
Source: PubMed Central journal article supplement (PMC7224377; doi:10.1038/s41598-020-64820-9), 2020-05-14
Supplement: 41598_2020_64820_MOESM1_ESM.pdf [file 41598_2020_64820_MOESM1_ESM.pdf]

# Immunity to vector saliva is compromised by short sand fly seasons in endemic regions with temperate climates

Fabiano Oliveira<sup>1</sup>, Ekaterina Giorgobiani<sup>1,2</sup>, Anderson B. Guimarães-Costa<sup>1</sup>, Maha Abdeladhim<sup>1</sup>, James Oristian<sup>1</sup>, Lamzira Tskhvaradze<sup>2</sup>, Nikoloz Tsertsvadze<sup>2</sup>, Mariam Zakalashvili<sup>2</sup>, Jesus G. Valenzuela<sup>1\*</sup>, and Shaden Kamhawi<sup>1\*</sup>

<sup>1</sup>Vector Molecular Biology Section, Laboratory of Malaria and Vector Research, National Institute of Allergy and Infectious Diseases, National Institutes of Health, Rockville, Maryland 20852, USA.

<sup>2</sup>R. G. Lugar Center for Public Health Research, National Center for Disease Control and Public Health (NCDC), Kakheti Highway 99, 0198, Tbilisi, Georgia.

**A**

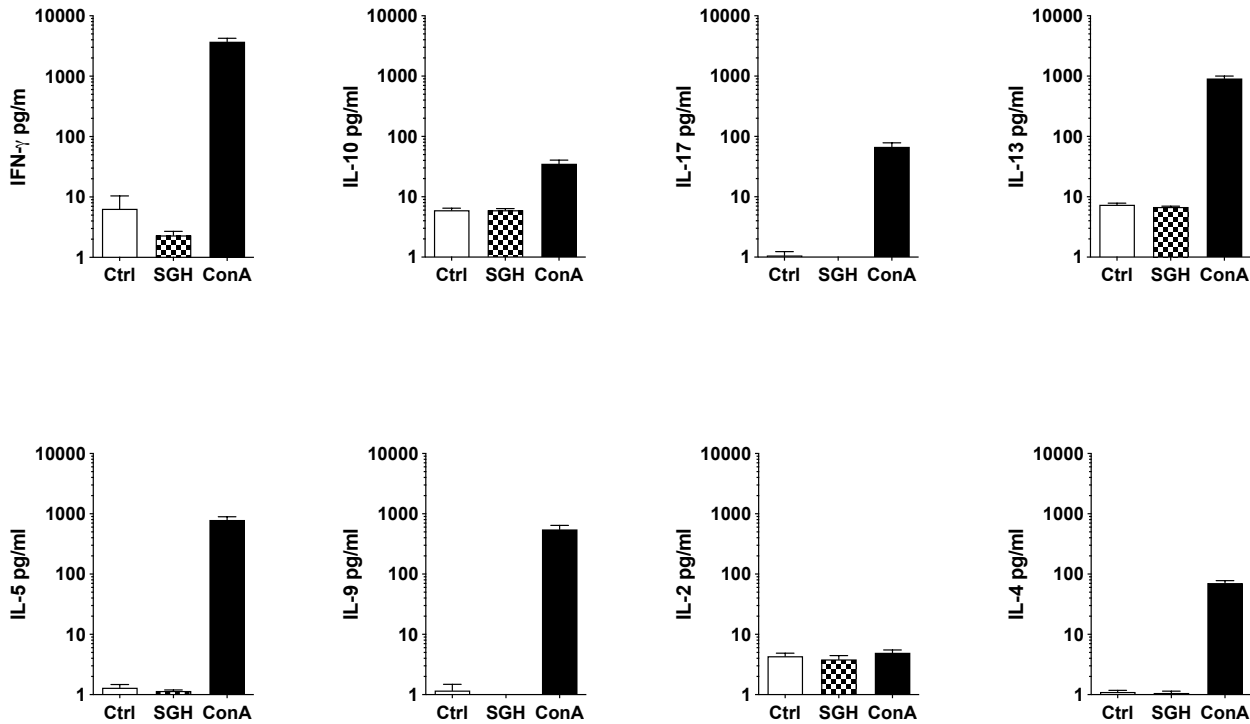

**B**

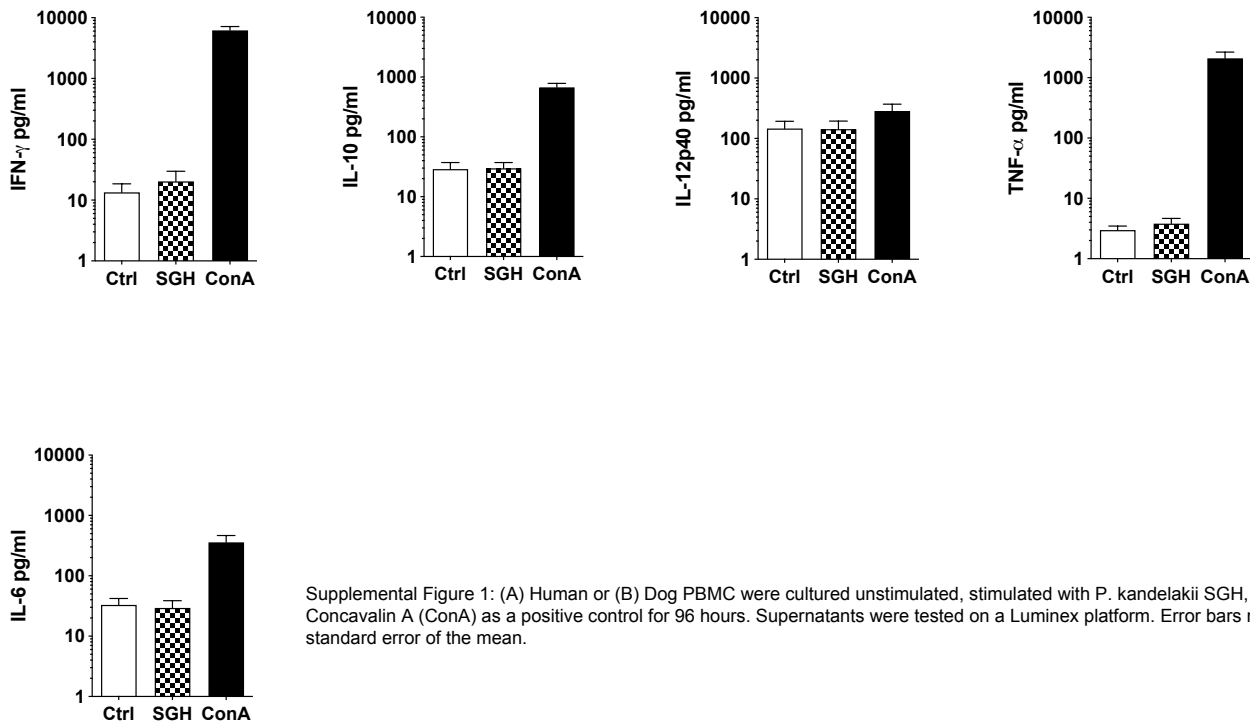

Supplemental Figure 1: (A) Human or (B) Dog PBMC were cultured unstimulated, stimulated with *P. kandelakii* SGH, or stimulated with Concanavalin A (ConA) as a positive control for 96 hours. Supernatants were tested on a Luminex platform. Error bars represent the standard error of the mean.
